# Supplementary material
Source: publisher site journal article supplement (https://www.dovepress.com/article/369703)
Supplement: Supplementary file 1 [file get_supplementary_file.php]

**Supplementary material**

**Investigator-initiated Additive Anti-inflammatory Action for Aortopathy & Arteriopathy (5A) Investigators**

Hong Liu MD, PhD, Department of Cardiovascular Surgery, the First Affiliated Hospital of Nanjing Medical University, Nanjing 210029, P.R China;

Sheng Zhao MD, PhD, Department of Cardiovascular Surgery, the First Affiliated Hospital of Nanjing Medical University, Nanjing 210029, P.R China;

Yong-feng Shao, MD, PhD, Department of Cardiovascular Surgery, the First Affiliated Hospital of Nanjing Medical University, Nanjing 210029, P.R China;

Zhi-wei Tang, MD, Department of Cardiovascular Surgery, the First Affiliated Hospital of Nanjing Medical University, Nanjing 210029, P.R China;

Si-chong Qian MD, PhD, Department of Cardiovascular Surgery, Beijing Anzhen Hospital, Capital Medical University, Beijing 100029, P.R China;

Hai-yang Li, MD, PhD, Department of Cardiovascular Surgery, Beijing Anzhen Hospital, Capital Medical University, Beijing 100029, P.R China;

Ying-yuan Zhang, MD, Department of Cardiovascular Surgery, the First Affiliated Hospital of Nanjing Medical University, Nanjing 210029, P.R China;

Huang-he He, MD, Department of Cardiovascular Surgery, the First Affiliated Hospital of Nanjing Medical University, Nanjing 210029, P.R China;

Ying Wu MD, Department of Laboratory, the First Affiliated Hospital of Shantou University Medical College, Shantou 515041, P.R China;

Liang Hong MD; Department of Cardiovascular Surgery, Nanjing First Hospital, Nanjing Medical University, Nanjing 210012, P.R China;

Ji-nong Yang MD; Department of Cardiovascular Surgery, the Affiliated Hospital of Qingdao University, Qingdao 266003, P.R China;

Ji-sheng Zhong MD; Department of Cardiovascular Surgery, Xiamen Cardiovascular Hospital, Xiamen University, Xiamen 361004, P.R China;

Tian Niu, MD, Department of Cardiovascular Surgery, Xiamen Cardiovascular Hospital, Xiamen University, Xiamen 361004, P.R China;

Yu-qi Wang MD; Department of Cardiovascular Surgery, Teda International Cardiovascular Hospital, Chinese Academy of Medical Sciences, Tianjin 300457, P.R China;

Bing-qi Sun MD; Department of Cardiovascular Surgery, Teda International Cardiovascular Hospital, Chinese Academy of Medical Sciences, Tianjin 300457, P.R China;

Dong Kai Wu MD, PhD, Department of Cardiovascular Surgery, Xiangya Hospital, Central South University, Changsha 410008, P.R China;

Guo-liang Fan MD, Department of Cardiovascular Surgery, Shanghai East Hospital, Tongji University, Shanghai 200120, P.R China.

Jun-quan Chen, MD, PhD, Department of Cardiovascular Surgery, Tianjin Chest Hospital, Tianjin Medical University, Tianjin 300222, P.R China;

Dong-dong Wu MD, PhD, Department of Cardiovascular Surgery, Beijing Fuwai Hospital, Peking Union Medical College & Chinese Academy of Medical Sciences, Beijing 100037, P.R China;

Yi-yao Jiang, MD, PhD, Department of Cardiovascular Surgery, the First Affiliated Hospital of Bengbu Medical College, Bengbu 233099, P.R China;

Sheng-qiang Zhang, MD, Department of Cardiovascular Surgery, the First Affiliated Hospital of Bengbu Medical College, Bengbu 233099, P.R China;

Si-qiang Zheng, MD, PhD, Department of Thoracic Surgery, Shanghai Lung Hospital, Tongji University, Shanghai 200433, P.R China;

Xin-ya Li, MD, PhD, Department of Cardiovascular Surgery, the First Hospital of University of Science and Technology of China, Hefei 230002, China;

Hong-hua Yue, MD, PhD, Department of Cardiovascular Surgery, West China School of Medicine and West China Hospital, Sichuan University, Chengdu 610041, China.
